# Supplementary material for: Detection of ATRX and IDH1-R132H immunohistochemistry in the progression of 211 paired gliomas
Source: PubMed Central journal article supplement (PMC4941322; doi:10.18632/oncotarget.7650), 2016-02-24
Supplement: oncotarget-07-16384-s001.pdf [file oncotarget-07-16384-s001.pdf]

## Detection of ATRX and IDH1-R132H immunohistochemistry in the progression of 211 paired gliomas

### Supplementary Materials

**Supplementary Table S1: Basic clinical feature for the classification of lower grade gliomas based on IDH1-R132H and ATRX status and GBM**

| Variables |             | IDH1-R132H/ATRXloss | IDH1-R132H/ATRXexpr | IDH-WT        | GBM            |
|-----------|-------------|---------------------|---------------------|---------------|----------------|
| Age       | ≤ 45 years  | 65                  | 44                  | 50            | 100            |
|           | > 45 years  | 17                  | 16                  | 37            | 81             |
| Gender    | Male        | 45                  | 34                  | 46            | 97             |
|           | Female      | 37                  | 26                  | 41            | 84             |
| Histology | A (II/III)  | 44                  | 6                   | 41            |                |
|           | OA (II/III) | 36                  | 42                  | 39            |                |
|           | O (II/III)  | 2                   | 12                  | 7             |                |
| PFS       | Median      | 860 (114–2216)      | 792 (105–1883)      | 477 (93–1771) | 395 (114–2265) |

**Abbreviations:** expr, expression; PFS, progression-free survival; A, astrocytoma; O, oligodendroglioma; OA, oligoastrocytoma; GBM, glioblastoma; IDH, isocitrate dehydrogenase, ATRX, alpha-thalassemia/mental retardation, X-linked.
